# Supplementary material for: Spectro-kinetic modelling of photocatalytic oxidation of heterocyclic compounds in a continuous-flow packed bed reactor
Source: Royal Society of Chemistry journal article supplement (doi:10.1039/d5ra09830k), 2026-04-17
Supplement: d5ra09830k1.pdf [file d5ra09830k1.pdf]

## Supplementary Information

### Spectro-Kinetic Modelling of Photocatalytic Oxidation of Heterocyclic Compounds in a Continuous-Flow Packed Bed Reactor

Rohit Pal<sup>a</sup>, Ramin Farnood<sup>a,\*</sup>

<sup>a</sup>Department of Chemical Engineering and Applied Chemistry, 200 College Street, Toronto, ON M5S 3E5, Canada.

#### S1. Determination of rate constant $k_5$ for $\cdot OH$ scavenging by $\cdot CR$

A general scavenging rate constant for  $\cdot OH$  by CAB cation ( $\cdot CR$ ) in aqueous solution is not known. However, reaction rates for similar heterocyclic cations as reported in literature<sup>[1]</sup> is listed below:

##### 1. Pyrrolidinium ion

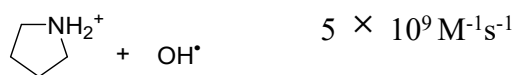

##### 2. Imidazolium ion

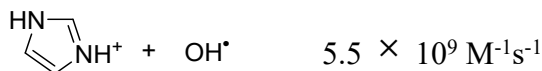

Dissolved organics in effluents from wastewater treatment plant are known to scavenge  $\cdot OH$  radicals. The rate constant for dissolved organics quenching  $\cdot OH$  radicals has been proposed to be in the range of  $(0.2 - 1.4) \times 10^9 \text{ M}^{-1}\text{s}^{-1}$  [2-4]. Table S2 lists some of the common aromatic organic compounds found in coking wastewater and their  $\cdot OH$  scavenging rate constants from literature<sup>[1,5]</sup>.

|                 |                                                  |
|-----------------|--------------------------------------------------|
| Aniline         | $1.4 \times 10^{10} \text{ M}^{-1}\text{s}^{-1}$ |
| Benzene         | $7.8 \times 10^9 \text{ M}^{-1}\text{s}^{-1}$    |
| Ethanol         | $1.9 \times 10^9 \text{ M}^{-1}\text{s}^{-1}$    |
| Cresol          | $1.2 \times 10^{10} \text{ M}^{-1}\text{s}^{-1}$ |
| Cyanide         | $0.8 \times 10^{10} \text{ M}^{-1}\text{s}^{-1}$ |
| Phenol          | $1.4 \times 10^{10} \text{ M}^{-1}\text{s}^{-1}$ |
| Thiocyanate ion | $1.1 \times 10^{10} \text{ M}^{-1}\text{s}^{-1}$ |

Based on the above observations and structure property relationship with other heterocyclic ions, we assume a value of  $1 \times 10^{10} \text{ M}^{-1}\text{s}^{-1}$  as the rate constant for the  $\cdot\text{OH}$  scavenging by  $\cdot\text{CR}$ . On a  $\mu\text{M}$  basis,  $k_5$  is calculated as  $36 \times 10^6 \mu\text{M}^{-1} \text{ h}^{-1}$ .

### S2: Photon flux determination from discrete spectral irradiance

The discrete spectral irradiance was obtained from Newport<sup>[6]</sup>. Photon flux can be calculated as:

$$q_p = \frac{I \times \lambda \times 5.03 \times 10^{15}}{6.02 \times 10^{17}}$$

| Wavelength,<br>$\lambda$ (nm) | Intensity, I<br>(mW/m <sup>2</sup> /nm) | Photon<br>Flux, $q_p$<br>( $\mu\text{mol}/\text{m}^2.\text{s}$ ) |
|-------------------------------|-----------------------------------------|------------------------------------------------------------------|
| 250.74                        | 17.45                                   | 0.04                                                             |
| 299.82                        | 119.97                                  | 0.30                                                             |
| 350.55                        | 162.79                                  | 0.48                                                             |
| 400.74                        | 203.85                                  | 0.68                                                             |
| 449.26                        | 200.60                                  | 0.75                                                             |
| 499.45                        | 251.19                                  | 1.05                                                             |
| 550.74                        | 217.37                                  | 1.00                                                             |
| 600.37                        | 213.91                                  | 1.07                                                             |

The photon flux over the irradiant photoreactor area was determined to be  $0.0376 \mu\text{mol}/\text{s}$ .

### S3: Peak intensity ratios and g-factor of ROS

| EPR spectrum | Peak intensity ratio | g-factor | Reference |
|--------------|----------------------|----------|-----------|
| DMPO-OH      | 1:2:2:1              | 2.0023   | [7]       |
| DMPO-OOH     | 1:1:1:1:1:1          | 2.004    | [8]       |
| DMPO-OCR     | 1:1:1:1:1:1          | 2.0027   | [9]       |

### S4: Calibration plot of TEMPOL

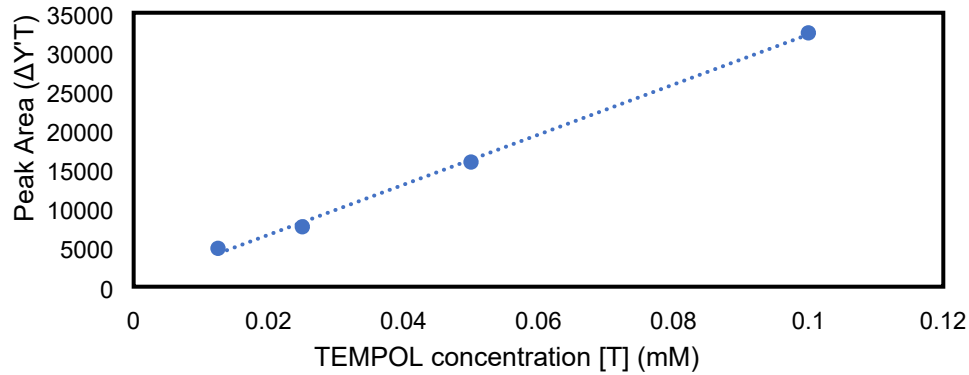

$$\Delta H/\Delta t = 100/60 = 2.$$

### S5: Rate constant $k_o$ for photocatalyst activation:

The value of  $k_o$  was estimated using the following equation by assuming photocatalyst particles are spherical in shape:

$$k_o = \frac{1}{4} \Phi Q_{abs} S_{BET}$$

Where  $\Phi$  is the quantum efficiency,  $Q_{abs}$  is the absorption efficiency, and  $S_{BET}$  is the BET surface area of the catalyst. Using experimental data from our earlier study<sup>[10]</sup>,  $k_o$  was estimated as  $\sim 6 \text{ m}^2, \text{g}^{-1}$ .

1.

### S6: XPS survey spectra of reduced Ag/AgBr/TiO<sub>2</sub>:

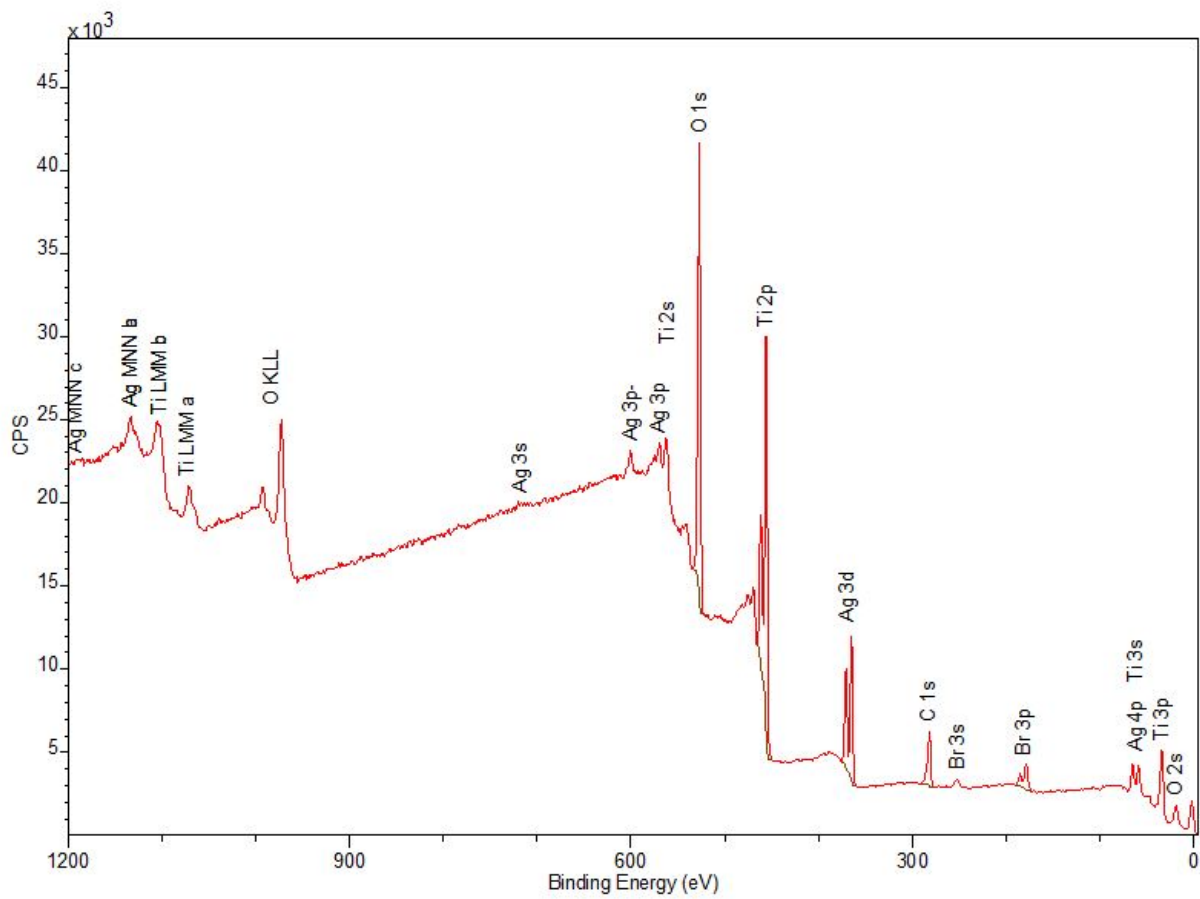

**S7: Atomic percentages of Ti, O, Ag, Br calculated from XPS**

| Element | Relative Atomic % |
|---------|-------------------|
| Ti 2p   | 22.7              |
| O 1s    | 49.7              |
| Ag 3d   | 3.3               |
| Br 3p   | 3.2               |

**S8: Band edge calculation:**

The position of the valence band, VB and the conduction band, CB can be determined, if the values of both the ionization energy and electron affinity are known. Conduction band potential is calculated as:

$$E_{CB}^0 = E_{VB}^0 - E_g$$

Where,  $E_{VB}^0$  is the valence band potential of photocatalyst<sup>[11]</sup> determined by VB XPS.

| <b>Photocatalyst</b>     | <b>Optical bandgap</b> | <b>CB potential</b> | <b>VB potential</b> |
|--------------------------|------------------------|---------------------|---------------------|
| TiO <sub>2</sub>         | 3.21                   | -0.34               | 2.87                |
| Ag/AgBr/TiO <sub>2</sub> | 2.78                   | -0.32               | 2.46                |

## **S9: Peak Deconvolution**

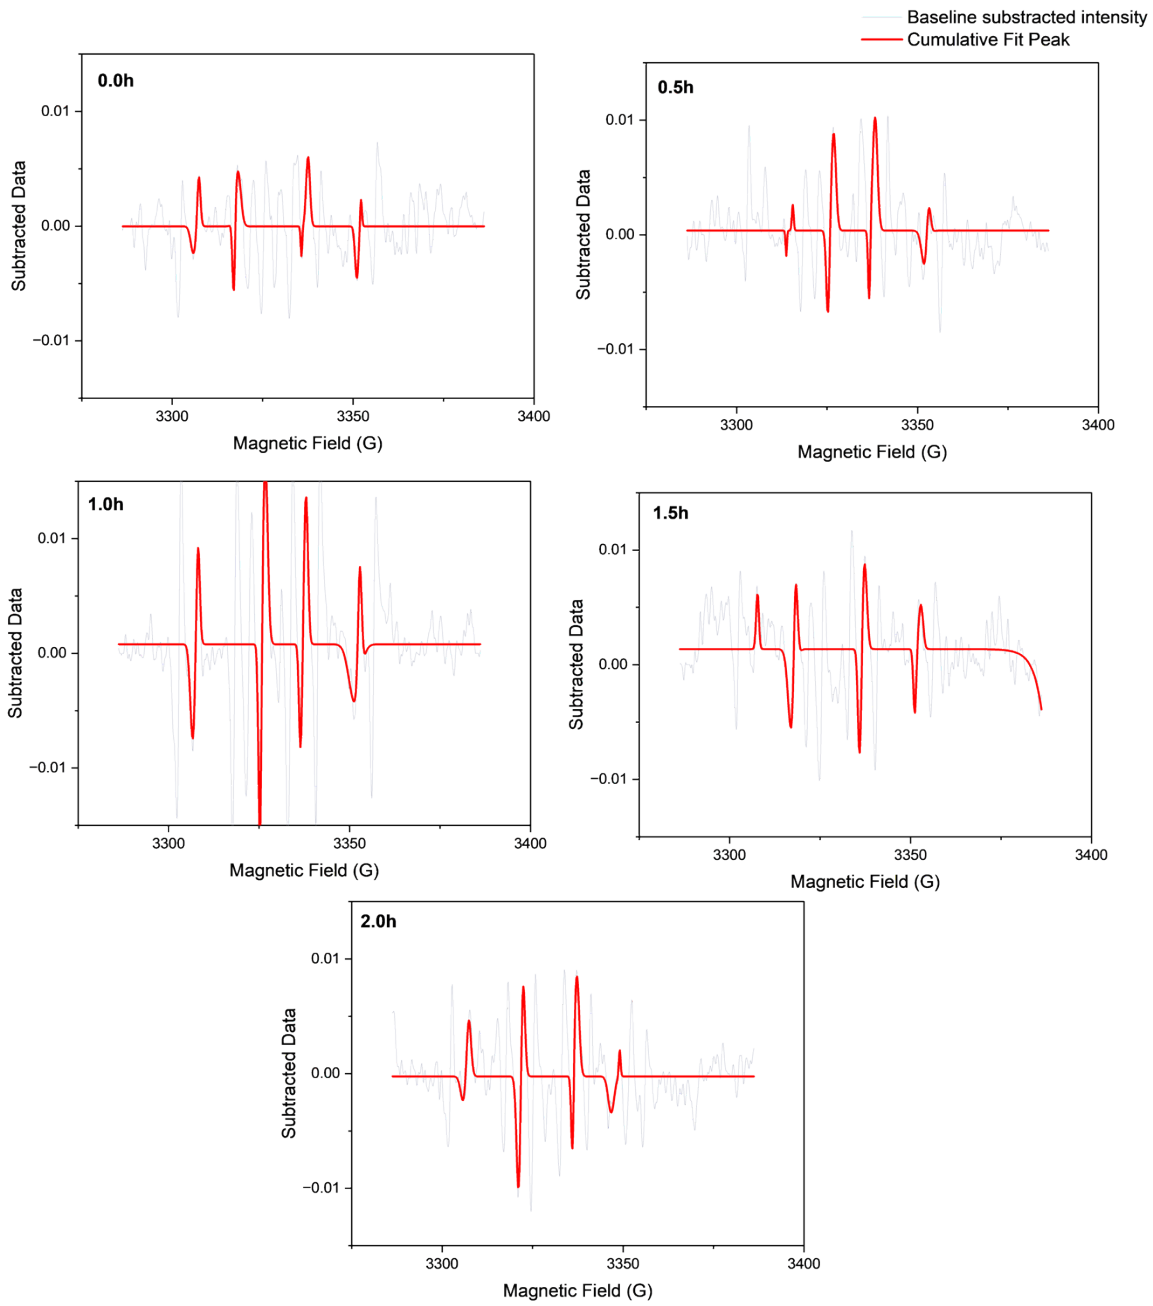

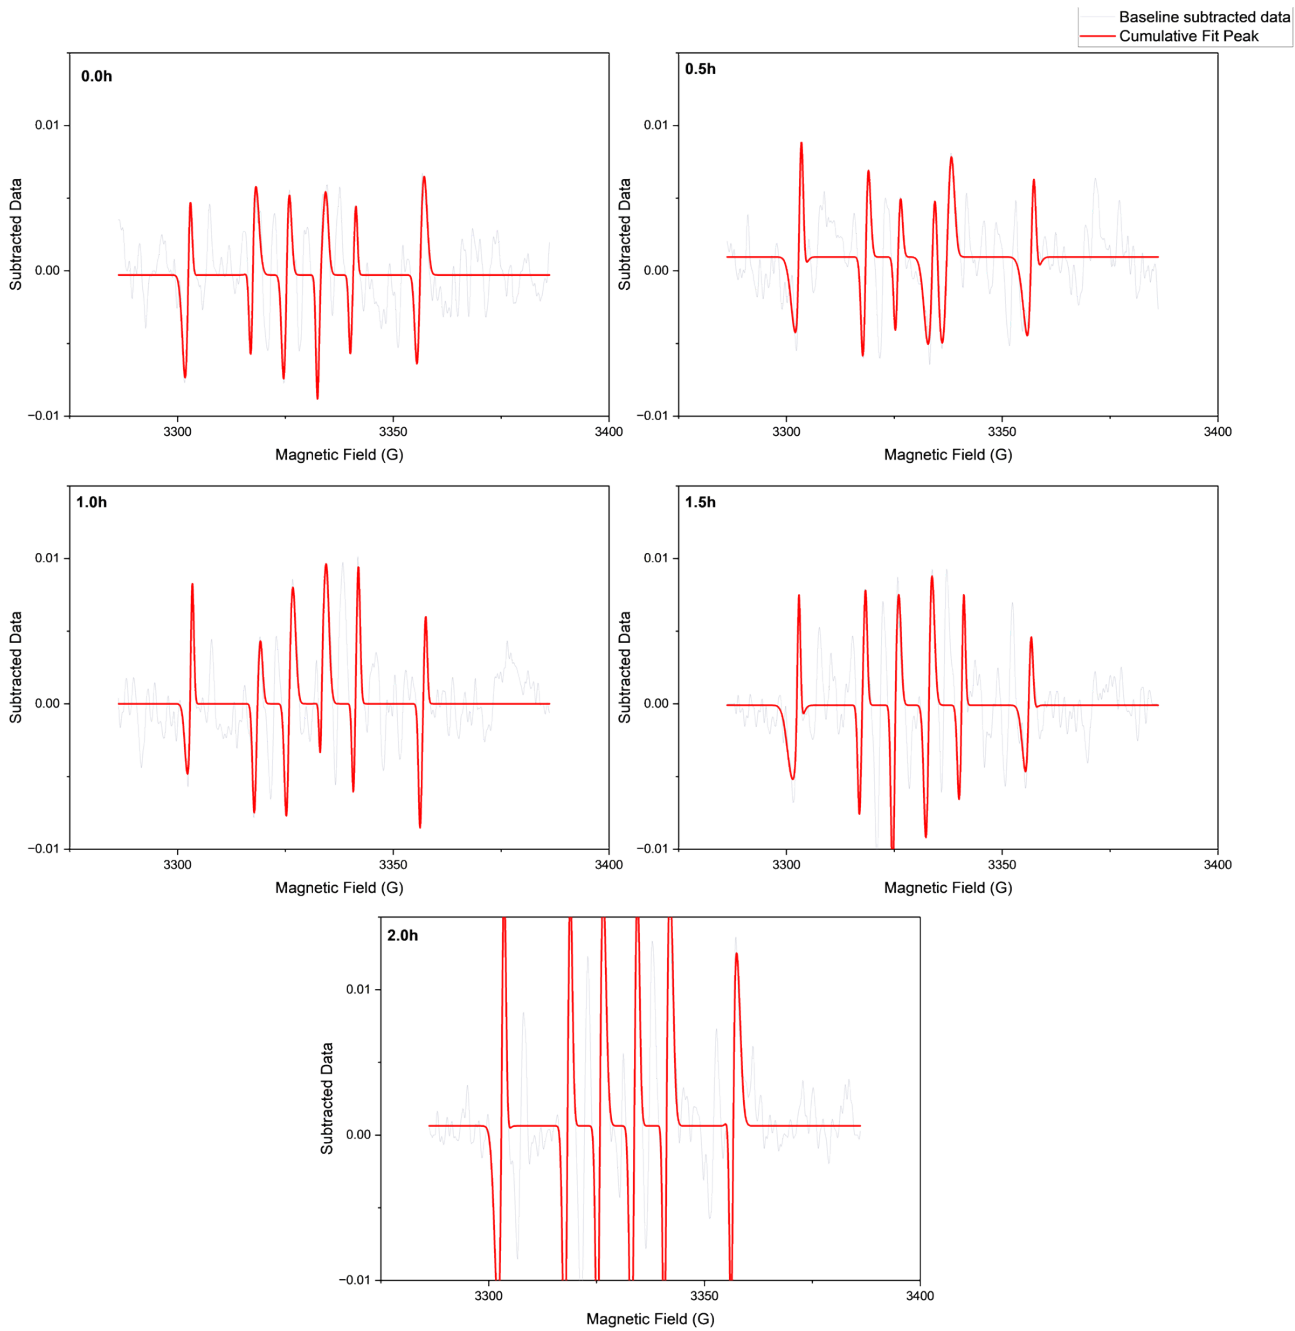

### S10: AQE reported in other photocatalytic system

| Photocatalytic system                                                               | AQE   | Reference |
|-------------------------------------------------------------------------------------|-------|-----------|
| Sc-Doped Rutile TiO <sub>2</sub>                                                    | 30%   | [12]      |
| Core-shell heterostructure of TiO <sub>2</sub> nanofibers with carbon quantum dots. | 52%   | [13]      |
| Pt nanoparticle-loaded P25 TiO <sub>2</sub>                                         | 56%   | [14]      |
| PtCu-TiO <sub>2</sub> sandwich photocatalyst                                        | 99.2% | [15]      |

#### References:

- [1] G. V. Buxton, C. L. Greenstock, W. P. Helman, A. B. Ross, "Critical Review of rate constants for reactions of hydrated electrons, hydrogen atoms and hydroxyl radicals ( $\cdot\text{OH}/\cdot\text{O}^-$  in Aqueous Solution" *Journal of Physical and Chemical Reference Data* **1988**, *17*, 513–886.
- [2] P. Westerhoff, S. P. Mezyk, W. J. Cooper, D. Minakata, "Electron Pulse Radiolysis Determination of Hydroxyl Radical Rate Constants with Suwannee River Fulvic Acid and Other Dissolved Organic Matter Isolates" *Environ. Sci. Technol.* **2007**, *41*, 4640–4646.
- [3] T. Arakaki, C. Anastasio, Y. Kuroki, H. Nakajima, K. Okada, Y. Kotani, D. Handa, S. Azechi, T. Kimura, A. Tshako, Y. Miyagi, "A General Scavenging Rate Constant for Reaction of Hydroxyl Radical with Organic Carbon in Atmospheric Waters" *Environ. Sci. Technol.* **2013**, *47*, 8196–8203.
- [4] J. Hoigné in *Quality and Treatment of Drinking Water II* (Ed.: J. Hrubec), Springer, Berlin, Heidelberg, **1998**, pp. 83–141.
- [5] Y. Lee, U. von Gunten, "Oxidative transformation of micropollutants during municipal wastewater treatment: Comparison of kinetic aspects of selective (chlorine, chlorine

- dioxide, ferrateVI, and ozone) and non-selective oxidants (hydroxyl radical)” *Water Research* **2010**, *44*, 555–566.
- [6], “Xe Arc Lamp - Xenon Lamps,” can be found under <https://www.newport.com/f/xenon-arc-lamps>(accessed 29 November 2024), **n.d.**
- [7] K. P. Huber, G. Herzberg, *Molecular Spectra and Molecular Structure*, Springer US, Boston, MA, **1979**.
- [8] J. W. Peters, C. S. Foote, “Chemistry of superoxide ion. II. Reaction with hydroperoxides” *J. Am. Chem. Soc.* **1976**, *98*, 873–875.
- [9] J. R. Morton, K. F. Preston, “Atomic parameters for paramagnetic resonance data” *Journal of Magnetic Resonance (1969)* **1978**, *30*, 577–582.
- [10] Y. Zang, R. Farnood, “Photocatalytic decomposition of methyl *tert*-butyl ether in aqueous slurry of titanium dioxide” *Applied Catalysis B: Environmental* **2005**, *57*, 275–282.
- [11] A. S. Hassanien, I. Sharma, “Band-gap engineering, conduction and valence band positions of thermally evaporated amorphous Ge<sub>15-x</sub> Sb<sub>x</sub> Se<sub>50</sub> Te<sub>35</sub> thin films: Influences of Sb upon some optical characterizations and physical parameters” *Journal of Alloys and Compounds* **2019**, *798*, 750–763.
- [12] F. Qin, Y. Kang, X. San, Y.-L. Tang, J. Li, X. Zhang, K. Zhang, G. Liu, “Spontaneous Exciton Dissociation in Sc-Doped Rutile TiO<sub>2</sub> for Photocatalytic Overall Water Splitting with an Apparent Quantum Yield of 30%” *J. Am. Chem. Soc.* **2025**, *147*, 12897–12907.
- [13] J. Cheng, Y. Wang, Y. Xing, M. Shahid, W. Pan, “A stable and highly efficient visible-light photocatalyst of TiO<sub>2</sub> and heterogeneous carbon core–shell nanofibers” *RSC Adv.* **2017**, *7*, 15330–15336.
- [14] R. Tahawy, M. Esmat, H. El-Hosainy, F. E. Farghaly, E.-S. A. Abdel-Aal, F. I. El-Hosiny, Y. Ide, “A layered titanate nanowire helps Pt/TiO<sub>2</sub> photocatalyst for solar hydrogen evolution from water with high quantum efficiency” *bull. Chem. Soc. Jpn.* **2024**, *97*, uoae079.
- [15] H. Wang, H. Qi, X. Sun, S. Jia, X. Li, T. J. Miao, L. Xiong, S. Wang, X. Zhang, X. Liu, A. Wang, T. Zhang, W. Huang, J. Tang, “High quantum efficiency of hydrogen production from methanol aqueous solution with PtCu–TiO<sub>2</sub> photocatalysts” *Nat. Mater.* **2023**, *22*, 619–626.
